# Supplementary material
Source: Frontiers journal article supplement (https://www.frontiersin.org/articles/396853)
Supplement: Data_Sheet_1.xlsx [file Data_Sheet_1.xlsx]

## Sheet: Supplementary Table
Order	Family	Species	Common Name	IPY_avg	IPY_avg_n	Litters_avg	Litters_avg_n	Pairs_avg	Pairs_avg_n	GM Reference	Paternal Care	Pair association	Breeding seasonality	Social structure	Sex Ratio (M/F)	Avg weight (kg)	Density (/km2)	sqrt(Density * Kg)	Climate	Trait Refs
Carnivora	Canidae	Canis latrans	Coyote	1	96	1	18	1	11	1	Intense	High-Moderate	Seasonal	Intermediate	0.88	13	4	7.21	Continental	1-6
Carnivora	Canidae	Canis rufus	Red wolf	-	-	0.977011	174	0.96	90	7	Moderate-Group	High-Moderate	Seasonal	Intermediate	1	21	0.091	1.38	Temperate	7-17
Carnivora	Canidae	Canis simensis	Ethiopian wolf	0.723	47	0.5	12	0.5	12	18	Moderate-Group	High-Moderate	Seasonal	Group	2.08	14.5	1.25	4.26	Temperate	18-25
Carnivora	Canidae	Lycaon pictus	African painted dog	0.821	28	0.6	10	0.4	5	26	Moderate-Group	Close	Weakly seasonal	Group	1.48	22	0.04	0.94	Temperate	2,3,25-32
Carnivora	Canidae	Lycaon pictus	African painted dog	0.686	86	0.475	20	-	-	29	Moderate-Group	Close	Weakly seasonal	Group	1.48	22	0.04	0.94	Temperate	2,3,25-32
Carnivora	Canidae	Otocyon megalotis	Bat-eared fox	0.872	42.5	0.8	15	-	-	33	Intense	Close	Seasonal	Pair	1.42	4	0.65	1.61	Dry	2,3,33-38
Carnivora	Canidae	Urocyon cinereoargenteus	Gray fox	0.705	22	0.643	7	0.643	7	39	Moderate	High-Moderate	Seasonal	Pair	0.7	5	0.97	2.2	Temperate	2,39-45
Carnivora	Canidae	Urocyon littoralis	Island fox	0.75	16	-	-	-	-	46	Moderate	Low-Moderate	Highly seasonal/synchrony	Pair	1.33	2	7	3.74	Temperate	25,31,32,38,46-51
Carnivora	Canidae	Vulpes lagopus	Arctic fox	0.675	137	0.643	28	0.64	28	52	Moderate	Low-Moderate	Highly seasonal/synchrony	Pair	1.21	4	0.095	0.62	Polar	2,52-55
Carnivora	Canidae	Vulpes velox	Swift fox	0.526	19	0.443	16	0.443	16	56	Moderate	Low-Moderate	Highly seasonal/synchrony	Pair	1.02	2	0.235	0.69	Dry	25,38,56-61
Carnivora	Canidae	Vulpes vulpes	Red fox	0.167	30	0.46875	16	0.46875	16	62	Moderate	Intermittent	Highly seasonal/synchrony	Group	0.91	6	19	10.68	Temperate	2,25,32,62-64
Carnivora	Herpestidae	Helogale parvula	Common dwarf mongoose	0.533	45	-	-	-	-	65	Moderate-Group	Close	Weakly seasonal	Group	1.17	0.35	36.5	3.57	Tropical	25,31,65-70
Carnivora	Herpestidae	Suricata suricatta	Meerkat	0.885	537	0.843	156.5	0.843	156.5	71	Moderate-Group	Close	Aseasonal	Group	1	0.726	12	2.95	Dry	25,31,32,71-80
Carnivora	Herpestidae	Suricata suricatta	Meerkat	0.779	253	0.766	86	-	-	74	Moderate-Group	Close	Aseasonal	Group	1	0.726	12	2.95	Dry	25,31,32,71-80
Cetartiodactyla	Bovidae	Madoqua kirkii	Kirk's dik-dik	1	12	1	12	1	11	81	None	Low-Moderate	Seasonal	Pair	0.93	4.5	19	9.25	Dry	25,31,32,38,81-85
Diprotodontia	Macropodidae	Petrogale assimilis	Rock wallaby	0.667	63	-	-	0.52381	21	86	None	Close	Aseasonal	Pair	0.9	4.5	86	19.67	Tropical	25,86-90
Diprotodontia	Petauridae	Petaurus australis	Yellow-bellied glider	0.731	13	0.731	13	0.571	7	91	None	High-Moderate	Aseasonal	Pair	1.1	0.531	6	1.78	Temperate	91-95
Diprotodontia	Phalangeridae	Trichosurus cunninghami	Mountain brushtail possum	0.645	31	0.645	31	0.645	31	96	None	High-Moderate	Seasonal	Pair	0.88	3.3	85	16.75	Temperate	25,38,96-98
Eulipotyphla	Soricidae	Crocidura russula	Greater white-toothed shrew	0.688	96	0.667	42	0.526	19	99	Intense	Low-Moderate	Weakly seasonal	Pair	0.81	0.013	560	2.65	Continental	25,31,32,99-101
Primates	Aotidae	Aotus azarae	Azara's night monkey	1	27	1	27	1	17	38	Intense	Close	Seasonal	Pair	0.94	1.25	35.5	6.66	Tropical	38,102-107
Primates	Callitrichidae	Saguinus geoffroyi	Geoffroy's tamarin	0.567	15	-	-	0.5	5	108	Moderate-Group	Close	Seasonal	Group	2.14	0.54	11.7	2.51	Tropical	108-109
Primates	Callitrichidae	Saguinus mystax	Moustached tamarin	0.893	28	0.851	21	0.571	7	110	Moderate-Group	Close	Weakly seasonal	Group	1.4	0.569	15.3	2.95	Tropical	110-114
Primates	Cheirogelidae	Cheirogaleus medius	Fat-tailed dwarf lemur	0.605	43	-	-	0.488095	20.5	115,116	Intense	Low-Moderate	Highly seasonal/synchrony	Pair	1.15	0.183	218.4	6.32	Dry	25,32,38,31,115-121
Primates	Cheirogelidae	Phaner furcifer	Fork-marked lemur	0.339	5.5	0.339	5.5	0.6	5	122	None	Intermittent	Weakly seasonal	Pair	1	0.42	40	4.1	Dry	25,38,122-124
Primates	Hylobatidae	Hylobates lar	Lar/White-handed gibbon	0.9	40	0.9	40	0.719	16	125	None	Close	Weakly seasonal	Intermediate	1.13	5.5	15.9	9.35	Tropical	125-131
Primates	Hylobatidae	Hylobates muelleri	Muller's Bornean gibbon	1	4	1	4	1	4	132	None	Close	Aseasonal*	Pair	1.25	5.5	8.65	6.9	Tropical	25,132-134
Primates	Hylobatidae	Nomascus gabriellae	Golden-cheeked gibbon	0.9	10	0.9	10	0.833333	6	135	None	Close	Aseasonal	Pair	0.82	7.2	1.36	3.13	Tropical	38,135-139
Primates	Lemuridae	Hapalemur griseus	Aloatran gentle lemur	0.911	45	-	-	0.56	25	140	Moderate	Close	Weakly seasonal	Pair	1.1	1.23	190	15.29	Tropical	25,31,32,140-142
Primates	Lepilemuridae	Lepilemur ruficaudatus	Red-tailed sportive lemurs	0.914	12	-	-	0.892045	9.5	143	None	Intermittent	Highly seasonal/synchrony	Pair	1.05	0.78	124	9.83	Dry	38,143-146
Primates	Tarsiidae	Tarsius lariang	Lariang tarsier	0.675	4.5	0.675	4.5	0.58	3.5	147	Moderate	Close	Aseasonal	Pair	1	0.11	217	4.89	Tropical	38,147-114
Rodentia	Bathyergidae	Cryptomys hottentotus	Common mole-rat	0.53	66	-	-	-	-	150	Moderate-Group	Low-Moderate	Weakly seasonal	Group	2.06	0.067	1025	8.29	Temperate	25,31,32,150-153
Rodentia	Bathyergidae	Fukomys anselli	Ansell's mole-rat	0.915	59	-	-	0.769231	13	154	Moderate-Group	Low-Moderate	Aseasonal	Group	1.08	0.058	370	4.63	Temperate	9,154-156
Rodentia	Bathyergidae	Fukomys damarensis	Damaraland mole-rat	0.821	305	-	-	0.4375	16	157	Moderate-Group	Low-Moderate	Aseasonal	Group	1.08	0.131	318	6.45	Dry	9,157-160
Rodentia	Castoridae	Castor canadensis	North American beaver	0.531	16	0.444444	9	-	-	161	Intense	Low-Moderate	Seasonal	Intermediate	0.7	20	29.7	24.37	Continental	25,161-166
Rodentia	Castoridae	Castor fiber	Eurasian beaver	1	40	1	24	1	8	167	Intense	Low-Moderate	Seasonal	Intermediate	1.88	22	0.3	2.57	Arctic	162,167-171
Rodentia	Cricetidae	Microtus kikuchii	Taiwan vole	1	31	1	24	1	20	172	Intense	Low-Moderate	Weakly seasonal	Pair	0.21	0.04	810.9	5.7	Temperate	172-175
Rodentia	Cricetidae	Microtus ochrogaster	Prairie vole	-	-	0.52168	29.5	0.522	29.5	176	Intense	High-Moderate	Weakly seasonal	Intermediate	0.45	0.04	4425	13.3	Continental	176-184
Rodentia	Cricetidae	Microtus ochrogaster	Prairie vole	0.709	43	0.444	9	0.444	9	185	Intense	High-Moderate	Weakly seasonal	Intermediate	0.45	0.04	4425	13.3	Continental	176-185
Rodentia	Cricetidae	Ondatra zibethicus	Muskrat	0.786	28	0.667	6	0.667	6	186	Intense	Low-Moderate	Weakly seasonal	Intermediate	0.67	1.362	19.5	5.15	Continental	36,186-190
Rodentia	Cricetidae	Peromyscus californicus	California mouse	1	82	-	-	1	22	191	Intense	High-Moderate	Weakly seasonal	Pair	1	0.022	1345	5.44	Temperate	3,25,31,32,38,191-197
Rodentia	Cricetidae	Peromyscus polionotus	Beach mouse	-	-	-	-	0.897959	147	198	Intense	Low-Moderate	Aseasonal	Pair	1	0.012	4000	6.93	Temperate	38,198-203
Rodentia	Nesomyidae	Hypogeomys antimena	Malagasy giant jumping rat	0.958	48	0.958	48	0.958	48	204,205	Moderate	Low-Moderate	Seasonal	Pair	0.97	1.2	4.4	2.3	Dry	25,31,32,38,204-208
Rodentia	Sciuridae	Marmota marmota	Alpine marmot	0.927	521	0.862	145	-	-	209	Moderate-Group	Low-Moderate	Highly seasonal/synchrony	Group	1.3	3.5	105	19.17	Polar	9,25,31,32,209-212
Scandentia	Tupaiidae	Tupaia tana	Large tree shrew	0.5	12	-	-	-	-	213	None	Intermittent	Aseasonal	Pair	0.69	0.225	49	3.32	Tropical	25,38,213-216
	1	Hennessy, C. A., Dubach, J. & Gehrt, S. D. Long-term pair bonding and genetic evidence for monogamy among urban coyotes (Canis latrans). J. Mammal. 93, 732–742 (2012).
	2	Bekoff, M., Diamond, J. & Mitton, J. B. Life-history patterns and sociality in canids: Body size, reproduction, and behavior. Oecologia 50, 386–390 (1981).
	3	Valdespino, C. Physiological constraints and latitudinal breeding season in the Canidae. Physiol. Biochem. Zool. 80, 580–91 (2007).
	4	Carlson, D. A. & Gese, E. M. Influence of exogenous gonadotropin-releasing hormone on seasonal reproductive behavior of the coyote (Canis latrans). Theriogenology 72, 773–783 (2009).
	5	Hennessy, C. A., Gehrt, S. D., Gates, R. J. & Waite, T. A. Mating Strategies And Pack Structure of Coyotes in an Uban Landscape: A Genetic Investigation. M.Sc. Thesis Ohio State Univ. 120 (2007).
	6	Kohn, M. H. et al. Estimating population size by genotyping faeces. Proc. R. Soc. B Biol. Sci. 266, 657–663 (1999).
	7	Sparkman, A. M., Adams, J. R., Steury, T. D., Waits, L. P. & Murray, D. L. Pack social dynamics and inbreeding avoidance in the cooperatively breeding red wolf. Behav. Ecol. 23, 1186–1194 (2012).
	8	Asa, C. S. & Valdespino, C. Canid reproductive biology: an integration of proximate mechanisms and ultimate causes. Am. Zool. 38, 251–259 (1998).
	9	Lukas, D. & Clutton-Brock, T. H. The Evolution of Social Monogamy in Mammals. Science 341, 526–530 (2013).
	10	Sparkman, A. M. et al. Evidence for sex-specific reproductive senescence in monogamous cooperatively breeding red wolves. Behav. Ecol. Sociobiol. 71, (2017).
	11	Paradiso, J. L. & Nowak, R. M. Canis rufus. Mamm. Species 1 (1972). doi:10.2307/3503948
	12	Sparkman, A. M. et al. Helper effects on pup lifetime fitness in the cooperatively breeding red wolf (Canis rufus). Proc. R. Soc. B Biol. Sci. 278, 1381–1389 (2011).
	13	Sparkman, A. M., Adams, J. R., Steury, T. D., Waits, L. P. & Murray, D. L. Direct fitness benefits of delayed dispersal in the cooperatively breeding red wolf (Canis rufus). Behav. Ecol. 22, 199–205 (2011).
	14	Faust, L. et al. Red Wolf (Canis rufus) Population Viability Analysis - Report to U.S. Fish and Wildlife Service. (2016).
	15	Neiffer, D. L., Marks, S. K., Klein, E. C. & Becker Courtney, C. Cecal inversion and subsequent colocolic intussusception in a red wolf (Canis rufus gregoryi). J. Zoo Wildl. Med. 30, 119–125 (1999).
	16	Gese, E. M. et al. Managing hybridization of a recovering endangered species: The red wolf Canis rufus as a case study. Curr. Zool. 61, 191–205 (2015).
	17	Hinton, J. W., Chamberlain, M. J. & Rabon, D. R. Red wolf (Canis rufus) recovery: A review with suggestions for future research. Animals 3, 722–744 (2013).
	18	Randall, D. A. et al. Inbreeding is reduced by female-biased dispersal and mating behavior in Ethiopian wolves. Behav. Ecol. 18, 579–589 (2007).
	19	Van Kesteren, F. et al. Sex, stress and social status: Patterns in fecal testosterone and glucocorticoid metabolites in male Ethiopian wolves. Gen. Comp. Endocrinol. 179, 30–37 (2012).
	20	Sillero-Zubiri, C., Gottelli, D. & Macdonald, D. W. Male philopatry, extra-pack copulations and inbreeding avoidance in Ethiopian wolves (Canis simensis). Behav. Ecol. Sociobiol. 38, 331–340 (1996).
	21	Sillero-Zubiri, C. Behavioural ecology of the Ethiopian wolf, Canis simensis. Faculty of Biological Sciences (University of Oxford, 1994).
	22	Sillero-Zubiri, C. Canis simensis. Mamm. Species 485, 1–6 (1994).
	23	Tallents, L. A., Randall, D. A., Williams, S. D. & MacDonald, D. W. Territory quality determines social group composition in Ethiopian wolves Canis simensis. J. Anim. Ecol. 81, 24–35 (2012).
	24	Yihune, M. & Bekele, A. Feeding ecology of the Ethiopian wolf in the Simien Mountains National Park, Ethiopia. Afr. J. Ecol. 52, 484–490 (2014).
	25	Cohas, A. & Allaine, D. Social structure influences extra-pair paternity in socially monogamous mammals. Biol. Lett. 5, 313–316 (2009).
	26	Girman, D. J. & Mills, M. G. L. A molecular genetic analysis of social structure, dispersal, and interpack relationships of the African wild dog (Lycaon pictus). Behav. Ecol. Sociobiology; 40, 187–198 (1997).
	27	Malcolm, J. R. & Marten, K. Natural selection and the communal rearing of pups in African wild dogs (Lycaon pictus). Behav. Ecol. Sociobiol. 10, 1–13 (1982).
	28	Frame, L. H., Malcolm, J. R., Frame, G. W. & van Lawick, H. Social Organization of African Wild Dogs (Lycaon pictus) on the Sernegeti Plains, Tanzania 1967 - 1978). Zeitschrift Fur Tierzuchtung Und Zuchtungsbiologie 50, 225–249 (1979).
	29	Spiering, P. A., Somers, M. J., Maldonado, J. E., Wildt, D. E. & Gunther, M. S. Reproductive sharing and proximate factors mediating cooperative breeding in the African wild dog (Lycaon pictus). Behav. Ecol. Sociobiol. 64, 583–592 (2010).
	30	McNutt, J. W. & Silk, J. B. Pup production, sex ratios, and survivorship in African wild dogs, Lycaon pictus. Behav. Ecol. Sociobiol. 62, 1061–1067 (2008).
	31	Clutton-Brock, T. H. & Isvaran, K. Paternity loss in contrasting mammalian societies. Biol. Lett. 2, 513–516 (2006).
	32	Isvaran, K. & Clutton-Brock, T. Ecological correlates of extra-group paternity in mammals. Proc. R. Soc. B Biol. Sci. 274, 219–24 (2007).
	33	Wright, H. W. Y., Gray, M. M., Wayne, R. K. & Woodroffe, R. B. Mating tactics and paternity in a socially monogamous canid, the bat-eared fox (Otocyon megalotis). J. Mammal. 91, 437–446 (2010).
	34	Wright, H. W. Y. Paternal den attendance is the best predictor of offspring survival in the socially monogamous bat-eared fox. Anim. Behav. 71, 503–510 (2006).
	35	Wright, H. W. Y. Monogamy in the bat-eared fox, Otocyon megalotis. PhD thesis, 251 (2004).
	36	Hayssen, V. D., van Tienhoven, A. & van Tienhoven, A. Asdell’s patterns of mammalian reproduction: A compendium of species-specific data. (Cornell University Press, 1993).
	37	Mackie, A. J. & Nel, J. A. J. Habitat selection, home range use, and group size of bat-eared foxes in the Orange Free State. South African J. Wildl. Res. 19, 135–139 (1989).
	38	Huck, M., Fernandez-Duque, E., Babb, P. & Schurr, T. Correlates of genetic monogamy in socially monogamous mammals: insights from Azara’s owl monkeys. Proc. R. Soc. B Biol. Sci. 281, 20140195 (2014).
	39	Weston Glenn, J. L., Civitello, D. J. & Lance, S. L. Multiple paternity and kinship in the gray fox (Urocyon cinereoargenteus). Mamm. Biol. 74, 394–402 (2009).
	40	Nicholson, W. S., Hill, E. P. & Briggs, D. Denning, Pup-Rearing, and Dispersal in the Gray Fox in East-Central Alabama. Source J. Wildl. Manag. J. WILDL. Manag. 49, 33–3733 (1985).
	41	Chamberlain, M. J. & Leopold, B. D. Movements and Space Use of Gray Foxes (Urocyon cinereoargenteus) Following Mate Loss. Source Am. Midl. Nat. 147, 409–412 (2002).
	42	Deuel, N. R. et al. Gray fox home range, spatial overlap, mated pair interactions and extra-territorial forays in southwestern Georgia, USA. Wildlife Biol. 1, wlb.00326 (2017).
	43	Chamberlain, M. J. & Leopold, B. D. Spatial use patterns, seasonal habitat selection, and interactions among adult gray foxes in Mississippi. J. Wildlife Manage. 64, 742–751 (2000).
	44	Layne, J. N. Reproductive characteristics of the gray fox in southern Illinois. J. Wildlife Manage. 22, 157–163 (1958).
	45	Wood, J. E. Age Structure and Productivity of a Grey Fox Population. J. Mammal. 39, 74–86 (1958).
	46	Roemer, G. W., Smith, D. A., Garcelon, D. K. & Wayne, R. K. The behavioural ecology of the island fox (Urocyon littoralis). J. Zool. 255, S0952836901001066 (2001).
	47	Ralls, K. et al. Social relationships and reproductive behavior of island foxes inferred from proximity logger data. J. Mammal. 94, 1185–1196 (2013).
	48	Garcelon, D. K., Roemer, G. W., Philips, R. B. & Coonan, T. J. Food provisioning by island foxes, Urocyon littoralis, to conspecifics caught in traps. Southwest. Nat. 44, 83–86 (1999).
	49	Asa, C. S., Bauman, J. E., Coonan, T. J. & Gray, M. M. Evidence for induced estrus or ovulation in a canid, the island fox (Urocyon littoralis). J. Mammal. 88, 436–440 (2007).
	50	Crooks, K. R. & Van Vuren, D. H. Spatial organization of the island fox (Urocyon littoralis) on Santa Cruz Island, California. J. Mammal. 77, 801–806 (1996).
	51	Moore, C. M. & Collins, P. W. Urocyon littoralis. Mammalian Species 489, 1–7 (1995).
	52	Cameron, C., Berteaux, D. & Dufresne, F. Spatial variation in food availability predicts extrapair paternity in the arctic fox. Behav. Ecol. 22, 1364–1373 (2011).
	53	Garrott, R. a., Eberhardt, L. E. & Hanson, W. C. Arctic fox denning behavior in northern Alaska. Canadian Journal of Zoology 62, 1636–1640 (1984).
	54	Strand, O. & Landa, A. Social Organization and Parental Behavior in the Arctic Fox. J. Mammal. 81, 223–233 (2000).
	55	Audet, M., Robbins, C. B. & Larivière, S. Alopex lagopus. Mamm. Species 713, 1–10 (2002).
	56	Kitchen, A. M., Gese, E. M., Waits, L. P., Karki, S. M. & Schauster, E. R. Multiple breeding strategies in the swift fox, Vulpes velox. Anim. Behav. 71, 1029–1038 (2006).
	57	Poessel, S. A. & Gese, E. M. Den attendance patterns in swift foxes during pup rearing: Varying degrees of parental investment within the breeding pair. J. Ethol. 31, 193–201 (2013).
	58	Kilgore Jr., D. L. An Ecological Study of the Swift Fox (Vulpes velox) in the Oklahoma Panhandle. Am. Midl. Nat. 81, 512–534 (1969).
	59	Kitchen, A. M., Gese, E. M., Karki, S. M. & Schauster, E. R. Spatial Ecology of Swift Fox Social Groups: From Group Formation To Mate Loss. J. Mammal. 86, 547–554 (2005).
	60	Schauster, E. R., Gese, E. M. & Kitchen, A. M. Population ecology of swift foxes ( Vulpes velox ) in southeastern Colorado. Can. J. Zool. 80, 307–319 (2002).
	61	Schauster, E. R., Gese, E. M. & Kitchen, A. M. An evaluation of survey methods for monitoring swift fox abundance. Wildl. Soc. Bull. 30, 464–477 (2002).
	62	Baker, P. J., Funk, S. M., Bruford, M. W. & Harris, S. Polygynandry in a red fox population: Implications for the evolution of group living in canids? Behav. Ecol. 15, 766–778 (2004).
	63	Vergara, V. Comparison of parental roles in male and female red foxes, Vulpes vulpes, in southern Ontario. Can. Field-Naturalist 115, 22–33 (2001).
	64	Larivière, S. & Pasitschniak-Arts, M. Vulpes vulpes. Mamm. Species 537, 1–11 (1996).
	65	Keane, B., Waser, P. M., Creel, S. R., Creel, N. M. & Elliott, L. F. Subordinate reproduction in dwarf mongooses. Anim. Behav. 47, 65–75 (1994).
	66	Schneider, T. C. & Kappeler, P. M. Social systems and life-history characteristics of mongooses. Biol. Rev. 89, 173–198 (2014).
	67	Rood, J. P. Mating relationships and breeding suppression in the dwarf mongoose. Anim. Behav. 28, 143–150 (1980).
	68	Rood, J. P. Group size, survival, reproduction, and routes to breeding in dwarf mongooses. Anim. Behav. 39, 566–572 (1990).
	69	Creel, S. in Behavioral Ecology and Conservation Biology (ed. Caro, T.) 246–265 (Oxford University Press, 1998).
	70	Hoffmann, M., Roberts, R. L. & Kern, J. Tree climbing and denning by Common Dwarf Mongoose Helogale parvula. Small Carniv. Conserv. 50, 66–67 (2014).
	71	Leclaire, S., Nielsen, J. F., Sharp, S. P. & Clutton-Brock, T. H. Mating strategies in dominant meerkats: Evidence for extra-pair paternity in relation to genetic relatedness between pair mates. J. Evol. Biol. 26, 1499–1507 (2013).
	72	Clutton-Brock, T. H., Russell, A. F. & Sharpe, L. L. Behavioural tactics of breeders in cooperative meerkats. Anim. Behav. 68, 1029–1040 (2004).
	73	Russell, A. F. et al. Factors affecting pup growth and survival in co-operatively breeding meerkats Suricata suricatta. J. Anim. Ecol. 71, 700–709 (2002).
	74	Griffin, a S. et al. A genetic analysis of breeding success in the cooperative meerkat (Suricata suricatta). Behav. Ecol. 14, 472–480 (2003).
	75	Clutton-Brock, T. H. et al. Reproduction and survival of suricates (Suricata suricatta) in the southern Kalahari. Afr. J. Ecol. 37, 69–80 (1999).
	76	Madden, J. R., Drewe, J. A., Pearce, G. P. & Clutton-Brock, T. H. The social network structure of a wild meerkat population: 2. Intragroup interactions. Behav. Ecol. Sociobiol. 64, 81–95 (2009).
	77	Drewe, J. A., Madden, J. R. & Pearce, G. P. The social network structure of a wild meerkat population: 1. Inter-group interactions. Behav. Ecol. Sociobiol. 63, 1295–1306 (2009).
	78	van Staaden, M. J. Suricata suricatta. Mammalian Species (1994).
	79	Bateman, A. W., Coulson, T. & Clutton-Brock, T. H. What do simple models reveal about the population dynamics of a cooperatively breeding species? Oikos 120, 787–794 (2011).
	80	English, S., Bateman, A. W. & Clutton-Brock, T. H. Lifetime growth in wild meerkats: Incorporating life history and environmental factors into a standard growth model. Oecologia 169, 143–153 (2012).
	81	Brotherton, P. N., Pemberton, J. M., Komers, P. E. & Malarky, G. Genetic and behavioural evidence of monogamy in a mammal, Kirk’s dik-dik (Madoqua kirkii). Proc. R. Soc. B Biol. Sci. 264, 675–681 (1997).
	82	Brotherton, P. N. M. & Rhodes, A. Monogamy without Biparental Care in a Dwarf Antelope. Proc. R. Soc. B Biol. Sci. 263, 23–29 (1996).
	83	Brotherton, P. N. M. & Manser, M. B. Female dispersion and the evolution of monogamy in the dik-dik. Anim. Behav. 54, 1413–1424 (1997).
	84	Jones, K. E. et al. PanTHERIA: a species-level database of life history, ecology, and geography of extant and recently extinct mammals. Ecology 90, 2648–2648 (2009).
	85	Augustine, D. J. Response of native ungulates to drought in semi-arid Kenyan rangeland. Afr. J. Ecol. 48, 1009–1020 (2010).
	86	Spencer, P. B. S., Horsup, A. B. & Marsh, H. D. Enhancement of reproductive success through mate choice in a social rock-wallaby, Petrogale assimilis (Macropododae) as revealed by microsatellite markers. Behav. Ecol. Sociobiol. 43, 1–9 (1998).
	87	Horsup, A. B. The behavioural ecology of the allied rock-wallaby, Petrogale assimilis. (James Cook University of North Queensland, 1996).
	88	Horsup, A. Home range of the allied rock-wallaby, Petrogale assimilis. Wildl. Res. 21, 725–732 (1994).
	89	Delaney, R. M. Life history and reproductive ecology of a tropical rock wallaby, Petrogale assimilis. (1993).
	90	Fisher, D. O. & Owens, I. P. F. Female home range size and the evolution of social organization in macropod marsupials. J. Anim. Ecol. 69, 1083–1098 (2000).
	91	Brown, M., Carthew, S. M. & Cooper, S. J. B. Monogamy in an Australian arboreal marsupial, the yellow-bellied glider (Petaurus australis). Aust. J. Zool. 55, 185–195 (2007).
	92	Brown, M. Socioecology and phylogeography of the Yellow-bellied Glider (Petaurus australis). (2006).
	93	Brown, M., Cooksley, H., Carthew, S. M. & Cooper, S. J. B. Conservation units and phylogeographic structure of an arboreal marsupial, the yellow-bellied glider (Petaurus australis). Aust. J. Zool. 54, 305–317 (2006).
	94	Lindenmayer, D. B. Differences in the biology and ecology of arboreal marsupials in forests of southeastern Australia. J. Mammal. 78, 1117–1127 (1997).
	95	Goldingay, R. L. & Kavanagh, R. P. Socioecology of the yellow-bellied glider, petaurus australis, at Waratah Creek, NSW. Aust. J. Zool. 38, 227–240 (1990).
	96	Martin, J. K., Handasyde, K. A., Taylor, A. C. & Coulson, G. Long-term pair-bonds without mating fidelity in a mammal. Behaviour 144, 1419–1445 (2007).
	97	Martin, J. K. & Handasyde, K. A. Comparison of bobuck (Trichosurus cunninghami) demography in two habitat types in the Strathbogie Ranges, Australia. J. Zool. 271, 375–385 (2007).
	98	Martin, J. K. & Martin, A. A. Resource distribution influences mating system in the bobuck (Trichosurus cunninghami: Marsupialia). Oecologia 154, 227–236 (2007).
	99	Bouteiller, C. & Perrin, N. Individual reproductive success and effective population size in the greater white-toothed shrew Crocidura russula. Proc. R. Soc. B Biol. Sci. 267, 701–705 (2000).
	100	Cantoni, D. & Vogel, P. Social organization and mating system of free-ranging, greater white-toothed shrews,. Anim. Behav. 38, 205–214 (1989).
	101	Duarte, L. C., Bouteiller, C., Fontanillas, I. P., Petit, E. & Perrin, N. Inbreeding in the greater white-toothed shrew, Crocidura russula. Evolution 57, 638–645 (2003).
	102	Fernandez-Duque, E., Rotundo, M. & Sloan, C. Density and population structure of owl monkeys (Aotus azarai) in the Argentinean Chaco. Am. J. Primatol. 53, 99–108 (2001).
	103	Fernandez-Duque, E., Rotundo, M. & Ramirez-Llorens, P. Environmental determinants of birth seasonality in night monkeys (Aotus azarai) of the Argentinian Chaco. Int. J. Primatol. 23, 639–656 (2002).
	104	Baer, J. F., Weller, R. E. & Kakoma, I. Aotus : the Owl Monkey. (Elsevier Science, 1994).
	105	Corley, M. K., Xia, S. & Fernandez-Duque, E. The role of intragroup agonism in parent-offspring relationships and natal dispersal in monogamous owl monkeys (Aotus azarae) of Argentina. Am. J. Primatol. 79, 1–12 (2017).
	106	Fernandez-Duque, E. High levels of intra-sexual competition in sexually monomorphic owl monkeys. Folia Primatol. 75, 260 (2004).
	107	Fernandez-Duque, E. Social monogamy in wild owl monkeys (Aotus azarae) of Argentina: The potential influences of resource distribution and ranging patterns. Am. J. Primatol. 78, 355–371 (2016).
	108	Díaz-Muñoz, S. L. Paternity and relatedness in a polyandrous nonhuman primate: Testing adaptive hypotheses of male reproductive cooperation. Anim. Behav. 82, 563–571 (2011).
	109	Ford, S. M. Evolution of sexual dimorphism in body weight in platyrrhines. Am. J. Primatol. 34, 221–244 (1994).
	110	Huck, M., Lottker, P., Bohle, U.-R. & Heymann, E. W. Paternity and kinship patterns in polyandrous moustached tamarins (Saguinus mystax). Am. J. Phys. Anthropol. 127, 449–464 (2005).
	111	Heymann, E. W. Social behaviour and infant carrying in a group of moustached tamarins, Saguinus mystax (primates: Platyrrhini: Callitrichidae), on Padre Isla, Peruvian Amazonia. Primates 31, 183–196 (1990).
	112	Huck, M., Löttker, P. & Heymann, E. W. Proximate mechanisms of reproductive monopolization in male moustached tamarins (Saguinus mystax). Am. J. Primatol. 64, 39–56 (2004).
	113	Löttker, P., Huck, M., Heymann, E. W. & Heistermann, M. Endocrine correlates of reproductive status in breeding and nonbreeding wild female moustached tamarins. Int. J. Primatol. 25, 919–937 (2004).
	114	Peres, C. A. Structure and spatial-organization of an Amazonian terra-firma forest Primate community. J. Trop. Ecol. 9, 259–276 (1993).
	115	Fietz, J. et al. High rates of extra-pair young in the pair-living fat-tailed dwarf lemur, Cheirogaleus medius. Behav. Ecol. Sociobiol. 49, 8–17 (2000).
	116	Schwensow, N., Fietz, J., Dausmann, K. & Sommer, S. MHC-associated mating strategies and the importance of overall genetic diversity in an obligate pair-living primate. Evol. Ecol. 22, 617–636 (2008).
	117	Fietz, J. & Dausmann, K. H. Costs and potential benefits of parental care in the nocturnal fat-tailed dwarf lemur (Cheirogaleus medius). Folia Primatol. 74, 246–258 (2003).
	118	Kappeler, P. M. Determinants of primate social organization: Comparative evidence and new insights from Malagasy lemurs. Biol. Rev. Camb. Philos. Soc. 72, 111–151 (1997).
	119	Fietz, J. Monogamy as a Rule Rather than Exception in Nocturnal Lemurs: the Case of the Fat-tailed Dwarf Lemur, Cheirogaleus medius. Ethology 105, 255–272 (1999).
	120	Lahann, P. Habitat utilization of three sympatric cheirogaleid lemur species in a littoral rain forest of southeastern Madagascar. Int. J. Primatol. 29, 117–134 (2008).
	121	Fredsted, T., Schierup, M. H., Groeneveld, L. F. & Kappeler, P. M. Genetic structure, lack of sex-biased dispersal and behavioral flexibility in the pair-living fat-tailed dwarf lemur, Cheirogaleus medius. Behav. Ecol. Sociobiol. 61, 943–954 (2007).
	122	Schülke, O., Kappeler, P. M. & Zischler, H. Small testes size despite high extra-pair paternity in the pair-living nocturnal primate Phaner furcifer. Behav. Ecol. Sociobiol. 55, 293–301 (2004).
	123	Schülke, O. & Kappeler, P. M. So near and yet so far: Territorial pairs but low cohesion between pair partners in a nocturnal lemur, Phaner furcifer. Anim. Behav. 65, 331–343 (2003).
	124	Harvey, P. H. & Clutton-Brock, T. H. Life History Variation in Primates. Evolution 39, 559–581 (1985).
	125	Barelli, C. et al. Extra-pair paternity confirmed in wild white-handed gibbons. Am. J. Primatol. 75, 1185–1195 (2013).
	126	Rafacz, M. L., Margulis, S. & Santymire, R. M. Hormonal Correlates of Paternal Care Differences in the Hylobatidae. Am. J. Primatol. 74, 247–260 (2012).
	127	Savini, T., Boesch, C. & Reichard, U. H. . Home-range characteristics and the influence of seasonality on female reproduction in white-handed gibbons (Hylobates lar) at Khao Yai National Park, Thailand. Am. J. Phys. Anthropol. 135, 1–12 (2008).
	128	Reichard, U. Extra‐pair Copulations in a Monogamous Gibbon Hylobates lar. Ethology 100, 99–112 (1995).
	129	Margulis, S. W., Burns, F. & Rothenberg, A. Sex ratio bias in managed populations of hylobatids. Folia Primatol. 82, 224–235 (2012).
	130	Dahl, J. F. & Nadler, R. D. Genital swelling in females of the monogamous gibbon,Hylobates (H.) lar. Am. J. Phys. Anthropol. 89, 101–108 (1992).
	131	Bartlett, T. Q., Light, L. E. O. & Brockelman, W. Y. Long-term home range use in white-handed gibbons (Hylobates lar) in Khao Yai National Park, Thailand. Am. J. Primatol. 78, 192–203 (2016).
	132	Oka, T. & Takenaka, O. Wild gibbons’ parentage tested by non-invasive DNA sampling and PCR-amplified polymorphic microsatellites. Primates 42, 67–73 (2001).
	133	Robbins, D., Chapman, C. A. & Wrangham, R. W. Group size and stability: Why do gibbons and spider monkeys differ? Primates 32, 301–305 (1991).
	134	Nijman, V. & Menken, S. B. J. Assessment of census techniques for estimating density and biomass of gibbons (Primates:Hylobatidae). Raffles Bull. Zool. 53, 169–179 (2005).
	135	Kenyon, M., Roos, C., Binh, V. T. & Chivers, D. Extrapair paternity in golden-cheeked gibbons (Nomascus gabriellae) in the secondary lowland forest of Cat Tien National Park, Vietnam. Folia Primatol. 82, 154–164 (2011).
	136	Huck, M. & Fernandez-duque, E. When dads help: Male behavioral care during primate infant development. (2013). doi:10.1007/978-1-4614-4060-4
	137	Bach, T. H., Chen, J., Hoang, M. D., Beng, K. C. & Nguyen, V. T. Feeding behavior and activity budget of the southern yellow-cheeked crested gibbons (Nomascus gabriellae) in a lowland tropical forest. Am. J. Primatol. 79, 1–14 (2017).
	138	Geissmann, T. & Anzenberger, G. Hormonal correlates of the ovarian cycle in the yellow- cheeked crested gibbon ( Nomascus gabriellae ), and a review of ovarian cycles in gibbons ( Hylobatidae ). 1994, 61–73 (2009).
	139	Geissmann, T. The Gibbon Network. 2008, 1–6 (2007).
	140	Nievergelt, C. M., Mutschler, T., Feistner, A. T. C. & Woodruff, D. S. Social system of the Alaotran gentle lemur (Hapalemur griseus alaotrensis): Genetic characterization of group composition and mating system. Am. J. Primatol. 57, 157–176 (2002).
	141	Taylor, T. D. & Feistner, A. T. C. Infant rearing in captive hapalemur griseus alaotrensis: Singleton versus twins. Folia Primatol. 67, 44–51 (1996).
	142	Mutschler, T., Nievergelt, C. M. & Feistner, A. T. C. Social organization of the Alaotran gentle lemur. Am. J. Primatol. 50, 9–24 (2000).
	143	Platner, K. Das genetische Paarungssystem von Lepilemur ruficaudatus. (2005).
	144	Hilgartner, R., Zinner, D. & Kappeler, P. M. Life history traits and parental care in Lepilemur ruficaudatus. Am. J. Primatol. 70, 2–11 (2008).
	145	Hilgartner, R., Fichtel, C., Kappeler, P. M. & Zinner, D. Determinants of pair-living in red-tailed sportive lemurs (Lepilemur ruficaudatus). Ethology 118, 466–479 (2012).
	146	Zinner, D., Hilgartner, R. D., Kappeler, P. M. & Pietsch, T. Social Organization of Lepilemur ruficaudatus. Int. J. Primatol. 24, 869–888 (2003).
	147	Driller, C., Perwitasari-Farajallah, D., Zischler, H. & Merker, S. The social system of lariang tarsiers (Tarsius lariang) as revealed by genetic analyses. Int. J. Primatol. 30, 267–281 (2009).
	148	Merker, S., Yustian, I. & Mühlenberg, M. Responding to forest degradation: Altered habitat use by Dian’s tarsier Tarsius dianae in Sulawesi, Indonesia. Oryx 39, 189–195 (2005).
	149	Merker, S. & Groves, C. P. Tarsius lariang: A new primate species from Western Central Sulawesi. Int. J. Primatol. 27, 465–485 (2006).
	150	Bishop, J. M., Jarvis, J. U. M., Spinks, A. C., Bennett, N. C. & O’Ryan, C. Molecular insight into patterns of colony composition and paternity in the common mole-rat Cryptomys hottentotus hottentotus. Mol. Ecol. 13, 1217–1229 (2004).
	151	Bennett, N. C. Aspects of the social behaviour in a captive colony of the Common mole-rat Cryptomys hottentotus from South Africa. Zeitschrift für Säugetierkd. 57, 294–309 (1992).
	152	Spinks, A. C., Van der Horst, G. & Bennett, N. C. Influence of breeding season and reproductive status on male reproductive characteristics in the common mole-rat, Cryptomys hottentotus hottentotus. J. Reprod. Fertil. 109, 79–86 (1997).
	153	Spinks, A. C., Bennett, N. C. & Jarvis, J. U. M. A comparison of the ecology of two populations of the common mole-rat, Cryptomys hottentotus hottentotus: the effect of aridity on food, foraging and body mass. Oecologia 125, 341–349 (2000).
	154	Patzenhauerová, H., Šklíba, J., Bryja, J. & Šumbera, R. Parentage analysis of Ansell’s mole-rat family groups indicates a high reproductive skew despite relatively relaxed ecological constraints on dispersal. Mol. Ecol. 22, 4988–5000 (2013).
	155	Sichilima, A., Bennett, N. & Faulkes, C. Field evidence for colony size and aseasonality of breeding and in Ansell’s mole-rat, Fukomys anselli (Rodentia: Bathyergidae). African Zool. 46, 334–339 (2011).
	156	Šklíba, J. et al. A maze-lover’s dream: Burrow architecture, natural history and habitat characteristics of Ansell’s mole-rat (Fukomys anselli). Mamm. Biol. 77, 420–427 (2012).
	157	Burland, T. M., Bennett, N. C., Jarvis, J. U. M. & Faulkes, C. G. Colony structure and parentage in wild colonies of co-operatively breeding Damaraland mole-rats suggest incest avoidance alone may not maintain reproductive skew. Mol. Ecol. 13, 2371–2379 (2004).
	158	Snyman, P. C., Jackson, C. R. & Bennett, N. C. Do dispersing non-reproductive female Damaraland mole-rats, Cryptomys damarensis (Rodentia: Bathyergidae) exhibit spontaneous or induced ovulation? Physiol. Behav. 87, 88–94 (2006).
	159	Jarvis, J. U. M. & Bennett, N. C. Eusociality has evolved independently in two genera of bathyergid mole-rats - but occurs in no other subterranean mammal. Behav. Ecol. Sociobiol. 33, 253–260 (1993).
	160	Jacobs, D. S., Bennett, N. C., Jarvis, J. U. M. & Crowe, T. M. The colony structure and dominance hierarchy of the Damaraland mole‐rat, Cryptomys damarensis (Rodentia: Bathyergidae), from Namibia. J. Zool. 224, 553–576 (1991).
	161	Crawford, J. C., Liu, Z., Nelson, T. A., Nielsen, C. K. & Bloomquist, C. K. Microsatellite analysis of mating and kinship in beavers (Castor canadensis). J. Mammal. 89, 575–581 (2008).
	162	Syrůčková, A. et al. Genetic relationships within colonies suggest genetic monogamy in the Eurasian beaver (Castor fiber). Mammal Res. 60, 139–147 (2015).
	163	Buech, R. R. Environmental relations and adaptive strategies of beavers (Castor canadensis) in a near-boreal region. (University of Minnesota, 1988).
	164	Brenner, F. J. Reproduction of the beaver in Crawford County, Pennsylvania. J. Wildlife Manage. 28, 743–747 (1964).
	165	Goldberg, C. S., Woodruff, K., Toldness, R. & Waits, L. P. Robust molecular sex identification of beaver (Castor canadensis) from non-destructive samples. Conserv. Genet. Resour. 3, 729–731 (2011).
	166	Smith, J. B., Windels, S. K., Wolf, T., Klaver, R. W. & Belant, J. L. Do transmitters affect survival and body condition of American beavers Castor canadensis ? Wildlife Biol. 22, 117–123 (2016).
	167	Shavadze, I. Extra pair copulation in the Eurasian beaver ( Castor fiber )? (2016).
	168	Rosell, F. & Bergan, F. Scent marking in Eurasian beaver Castor fiber during winter. Acta Theriol. 45, 281–287 (2000).
	169	Parker, H., Rosell, F., Hermansen, T. A. & Sorlokk, G. Sex and Age Composition of Spring-Hunted Eurasian Beaver in Norway. J. Wildlife Manage. 66, 1164–1170 (2002).
	170	Sharpe, F. & Rosell, F. Time budgets and sex differences in the Eurasian beaver. Anim. Behav. 66, 1059–1067 (2003).
	171	Pinto, B., Santos, M. J. & Rosell, F. Habitat selection of the Eurasian beaver (Castor fiber) near its carrying capacity: an example from Norway. Can. J. Zool. 87, 317–325 (2009).
	172	Wu, J. S., Chiang, P. J. & Lin, L. K. Monogamous system in the Taiwan vole Microtus kikuchii inferred from microsatellite DNA and home ranges. Zool. Stud. 51, 204–212 (2012).
	173	Lu, M. S. Ecology and reproduction of Microtus kikuchii in the Ho-huan-shan area. (Tunghai University, 1991).
	174	Lee, C., Chiu, C., Lin, L. & Lin, Y. K. Partner Preference and Mating System of the Taiwan Field Vole ( Microtus kikuchii ). 59, 127–138 (2014).
	175	Yu, H.-T. Natural history of small mammals of subtropical montane areas in central Taiwan. J. Zool. 231, 403–422 (1993).
	176	Streatfeild, C. A., Mabry, K. E., Keane, B., Crist, T. O. & Solomon, N. G. Intraspecific variability in the social and genetic mating systems of prairie voles, Microtus ochrogaster. Anim. Behav. 82, 1387–1398 (2011).
	177	Solomon, N. G. Comparison of parental behavior in male and female prairie voles (Microtus ochrogaster). Can. J. Zool. 71, 1991–1994 (1993).
	178	Getz, L. L., McGuire, B. & Pizzuto, T. Social organization of the prairie vole (Microtus ochrogaster). J. Mammal. 74, 44–58 (1993).
	179	Blocker, T. D. & Ophir, A. G. A preference to bond? Male prairie voles form pair bonds even in the presence of multiple receptive females. Anim. Behav. 122, 89–97 (2016).
	180	Wolff, J. O., Ophir, A. G. & Phelps, S. M. Asynchronous breeding in the socially monogamous prairie vole. Can. J. Zool. 86, 339–343 (2008).
	181	Mcguire, B., Getz, L. L. & Oli, M. K. Fitness consequences of sociality in prairie voles, Microtus ochrogaster: influence of group size and composition. Anim. Behav. 64, 645–654 (2002).
	182	Stalling, D. T. Microtus ochrogaster. Mamm. Species 355, 1 (1990).
	183	Jameson Jr., E. W. Natural history of the prairie vole. Univ. Kansas Publ. Museum Nat. Hist. 1, 125–151 (1947).
	184	Getz, L. L., Simms, L. E. & McGuire, B. Nestling survival and population cycles in the prairie vole, &lt;i&gt;Microtus ochrogaster&lt;/i&gt; Can. J. Zool. 78, 1723–1731 (2000).
	185	Solomon, N., Keane, B., Knoch, L. R. & Hogan, P. J. Multiple paternity in socially monogamous prairie voles (Microtus ochrogaster). Can. J. Zool. 82, 1667–1671 (2004).
	186	Marinelli, L., Messier, F. & Plante, Y. Consequences of following a mixed reproductive strategy in muskrats. J. Mammal. 78, 163–172 (1997).
	187	Marinelli, L. & Messier, F. Parental-care strategies among muskrats in a female-biased population. Can. J. Zool. 73, 1503–1510 (1995).
	188	Olsen, P. F. Muskrat breeding biology at Delta, Manitoba. J. Wildlife Manage. 23, 40–53 (1959).
	189	Errington, P. L. The Breeding Season of the Muskrat in Northwest Iowa. J. Mammal. 18, 333–337 (1937).
	190	Gorbunova, V. & Seluanov, A. Coevolution of telomerase activity and body mass in mammals: From mice to beavers. Mech. Ageing Dev. 7, 1225–1241 (2009).
	191	Ribble, D. O. The monogamous mating system of Peromyscus cahTornicus as revealed by DNA fingerprinting. Behav. Ecol. Sociobiol. 29, 161–166 (1991).
	192	Ribble, D. O. & Salvioni, M. Social organization and nest co-occupancy in Peromyscus californicus, a monogamous rodent. Behav. Ecol. Sociobiol. 26, 9–15 (1990).
	193	Gubernick, D. J. & Teferi, T. Adaptive significance of male parental care in a monogamous mammal. Proc. R. Soc. B Biol. Sci. 267, 147–150 (2000).
	194	Gubernick, D. J., Wright, S. L. & Brown, R. E. The significane of the father’s presence for offspring survival in the monogamous California mouse, Peromyscus californicus. Animal Behavior 46, 539–546 (1993).
	195	Gubernick, D. J. & Nordby, J. C. Mechanisms of sexual fidelity in the monogamous California mouse, Peromyscus californicus. Behav. Ecol. Sociobiol. 32, 211–219 (1993).
	196	Davenport Jr, L. Structure of two Peromyscus polionotus populations in old-field ecosystems at the AEC Savannah River Plant. J. Mammal. 45, 95–113 (1964).
	197	Kalcounis-Rüppell, M. C. & Millar, J. S. Partitioning of Space, Food, and Time By Syntopic Peromyscus Boylii and P. Californicus. J. Mammal. 83, 614–625 (2002).
	198	Foltz, D. W. Genetic evidence for long-term monogamy in a small rodent, Peromyscus polionotus. Am. Nat. 117, 665–75 (1981).
	199	Margulis, S. W. Relationships among parental inbreeding, parental behaviour and offspring viability in oldfield mice. Anim. Behav. 55, 427–438 (1998).
	200	Margulis, S. W., Nabong, M., Alaks, G., Walsh, A. & Lacy, R. C. Effects of early experience on subsequent parental behaviour and reproductive success in oldfield mice, Peromyscus polionotus. Anim. Behav. 69, 627–634 (2005).
	201	Smith, M. H. The evolutionary significance of certain behavioral, physiological, and morphological adaptations of the old-field mouse, Peromyscus polionotus. (1966).
	202	Rave, E. & Holler, N. Population Dynamics of Beach Mice (Peromyscus polionotus ammobates) in Southern Alabama. J. Mammal. 73, 347–355 (1992).
	203	Mabry, K. E., Dreelin, E. A. & Barrett, G. W. Influence of landscape elements on population densities and habitat use od three small mammal species. J. Mammal. 84, 20–25 (2003).
	204	Sommer, S. & Tichy, H. Major histocompatibility complex (MHC) class II polymorphism and paternity in the monogamous Hypogeomys antimena, the endangered, largest endemic Malagasy rodent. Mol. Ecol. 8, 1259–1272 (1999).
	205	Sommer, S. Effects of habitat fragmentation and changes of dispersal behaviour after a recent population decline on the genetic variability of noncoding and coding DNA of a monogamous Malagasy rodent. Mol. Ecol. 12, 2845–2851 (2003).
	206	Sommer, S. Reproductive ecology of the endangered monogamous Malagasy giant jumping rat, Hypogeomys antimena. Mamm. Biol. 66, 111–115 (2001).
	207	Sommer, S. & Hommen, U. Modelling the effects of life-history traits and changing ecological conditions on the population dynamics and persistence of the endangered Malagasy giant jumping rat (Hypogeomys antimena). Anim. Conserv. 3, 333–343 (2000).
	208	Sommer, S., Toto Volahy, A. & Seal, U. S. A population and habitat viability assessment for the higly endangered giant jumping rat (Hypogeomys antimena), the largest extant endemic rodent of Madagascar. Anim. Conserv. 5, 263–273 (2002).
	209	Ferrandiz-Rovira, M., Allainé, D., Callait-Cardinal, M. P. & Cohas, A. Mate choice for neutral and MHC genetic characteristics in Alpine marmots: different targets in different contexts? Ecol. Evol. 6, 4243–4257 (2016).
	210	Exner, C. et al. Hormonal and behavioural changes during the mating season and pregnancy in Alpine marmots (Marmota marmota). Reproduction 126, 775–782 (2003).
	211	Allaine, D., Rodrigue, I., Leberre, M. & Ramousse, R. Habitat Preferences of Alpine Marmots, Marmota-Marmota. Can. J. Zool. Can. Zool. 72, 2193–2198 (1994).
	212	Boero, D. L. Population dynamics, mating system and philopatry in a high altitude colony of alpine marmots (marmota marmota l.). Ethol. Ecol. Evol. 11, 105–122 (1999).
	213	Munshi-South, J. Extra-pair paternity and the evolution of testis size in a behaviorally monogamous tropical mammal, the large treeshrew (Tupaia tana). Behav. Ecol. Sociobiol. 62, 201–212 (2007).
	214	Munshi-South, J., Emmons, L. H. & Bernard, H. Behavioral monogamy and fruit availability in the large treeshrew (Tupaia tana) in Sabah, Malaysia. J. Mammal. 88, 1427–1438 (2007).
	215	Emmons, L. H. Tupai. (University of California Press, 2000).
	216	Munshi-South, J. Asocial monogamy, extra-pair paternity, and dispersal in the large treeshrew (Tupaia tana). (2006).
